# Supplementary material for: High-Performance, Degradable, Self-Healing Bio-Based Nanocomposite Coatings with Antibacterial and Antioxidant Properties
Source: MDPI journal article supplement (doi:10.3390/nano13071220), 2023-03-29
Supplement: s1 [file s1]

# Supplementary Materials

## High-Performance, Degradable, Self-Healing Bio-Based Nanocomposite Coatings with Antibacterial and Antioxidant Properties

Qiang Zhang <sup>1,2,3</sup>, Qihang Bu <sup>1,2,3</sup>, Jiangyue Xia <sup>2,3</sup>, Rongxue Sun <sup>2,3</sup>, Dajing Li <sup>2,3</sup>,  
Haibo Luo <sup>1,\*</sup>, Ning Jiang <sup>2,3,\*</sup> and Cheng Wang <sup>2,3,\*</sup>

<sup>1</sup> School of Food and Pharmaceutical Engineering, Nanjing Normal University, Nanjing 210023, China

<sup>2</sup> Institute of Agricultural Products Processing, Jiangsu Academy of Agricultural Sciences, Nanjing 210014, China

<sup>3</sup> Integrated Scientific Research Base for Preservation, Storage and Processing Technology of Aquatic Products of the Ministry of Agriculture and Rural Affairs, Nanjing 210014, China

\* Correspondence: luohaibo\_1216@126.com (H.L.); jaas\_jiangning@163.com (N.J.); wangcheng@jaas.ac.cn (C.W.)

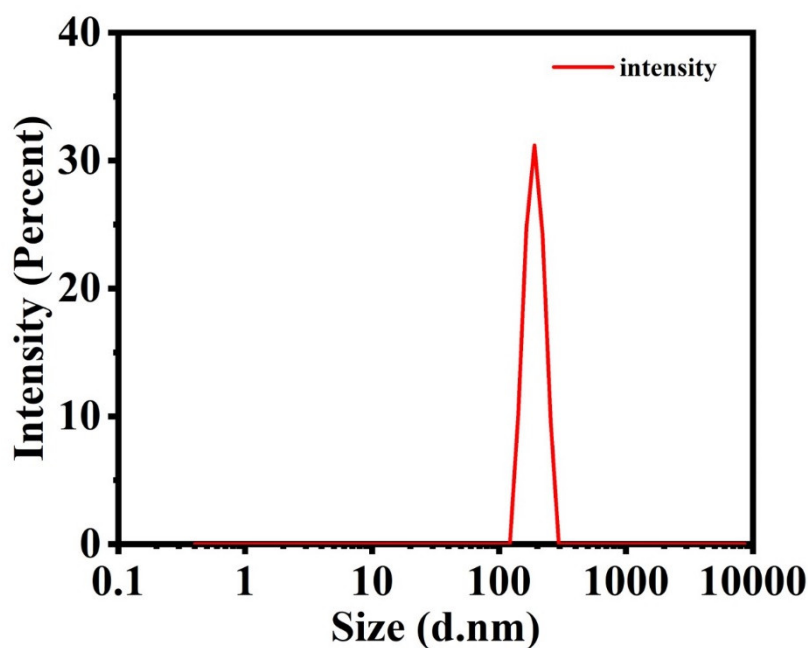

Figure S1. Particle size distribution of chitosan nanoparticles loaded with GA

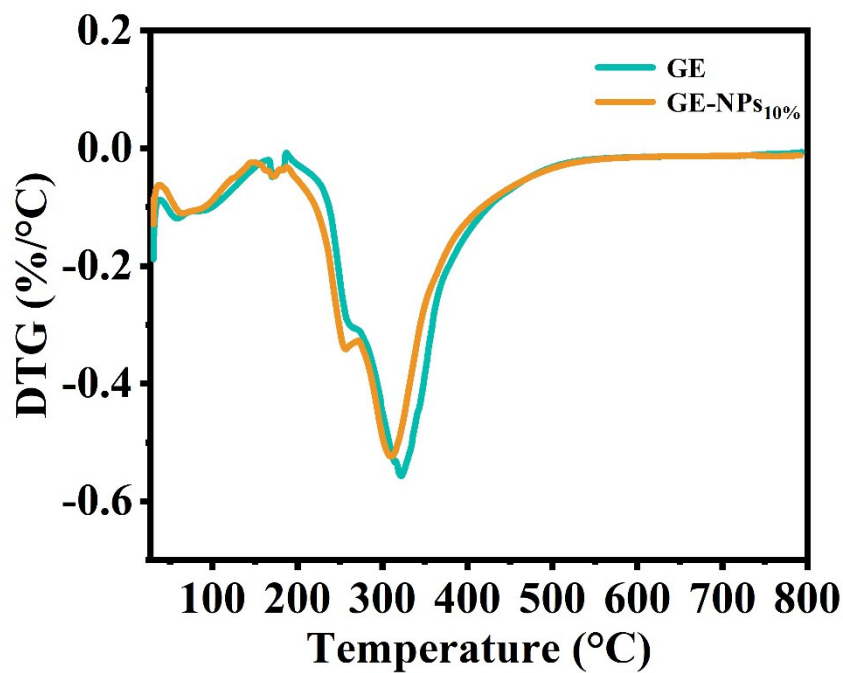

**Figure S2.** DTG spectrum of GE coating and GE-NPs10% coating

**Table S1.** Thermal degradation temperatures ( $T_{peak}$ , °C) and weight loss ( $\Delta W$ , %) of GE coating and GE-NPs10% coating

| Sample    | $\Delta 1$ |             | $\Delta 2$ |             | $\Delta 3$ |             | Residue (%) |
|-----------|------------|-------------|------------|-------------|------------|-------------|-------------|
|           | $T_{peak}$ | $\Delta W1$ | $T_{peak}$ | $\Delta W2$ | $T_{peak}$ | $\Delta W3$ |             |
| GE        | 55         | 13.5        | 262        | 12.2        | 322        | 51.3        | 18.8        |
| GE-NPs10% | 60         | 10.6        | 256        | 18.9        | 307        | 45          | 20.9        |

$\Delta 1$ ,  $\Delta 2$  and  $\Delta 3$  denote the first, second and third stage weight loss, respectively, of coating during heating scan.
